# Supplementary material for: Comparative Characterization of Hot-Pressed Polyamide 11 and 12: Mechanical, Thermal and Durability Properties
Source: MDPI journal article supplement (doi:10.3390/polym13203553), 2021-10-15
Supplement: s1 [file s1]

# Supporting information

## Comparative characterization of hot-pressed polyamide 11 and 12:

### mechanical, thermal and durability properties

M. Bahrami<sup>1</sup>, J. Abenojar<sup>1,2</sup>, M.A. Martínez<sup>1</sup>

<sup>1</sup>Materials Science and Engineering Department, University Carlos III de Madrid, Leganes, Spain

<sup>2</sup>Mechanical Engineering Department, ICAI, Universidad Pontificia Comillas, Madrid, Spain

\* Corresponding author: mbahrami@ing.uc3m.es

Table S1: Thermal properties of PA11 powder analyzed by DSC

|                           | 1st Heating | Cooling | 2nd Heating |
|---------------------------|-------------|---------|-------------|
| $T_g$ (°C)                | 53.97       | -       | 55.03       |
| $\Delta H_{relax.}$ (J/g) | 1.21        | -       | -           |
| $T_w$ (°C)                | 91.65       | -       | -           |
| $T_m$ (°C)                | 192.25      | -       | 191         |
| $T_c$ (°C)                | -           | 158.95  | -           |
| $\Delta H$ (J/g)          | 44.86       | 39.57   | 51.68       |
| $\chi_c$ (%)              | 20.03       | 17.66   | 23.07       |

Table S2: Thermal properties of PA12 powder analyzed by DSC

|                    | 1st Heating | Cooling | 2nd Heating |
|--------------------|-------------|---------|-------------|
| $T_g$ (°C)         | 55.32       | -       | 56.99       |
| $DH_{water}$ (J/g) | 1.49        | -       | -           |
| $T_w$ (°C)         | 83.36       | -       | -           |
| $T_m$ (°C)         | 184.26      | -       | 182.75      |
| $DH$ (J/g)         | 47.69       | -       | 55.59       |
| $T_c$ (°C)         | 158.61*     | 140.46  | -           |
| $DH_c$ (J/g)       | 1.74*       | 53.79   | -           |
| $\chi_c$ (%)       | 50.2        | 56.62   | 58.51       |

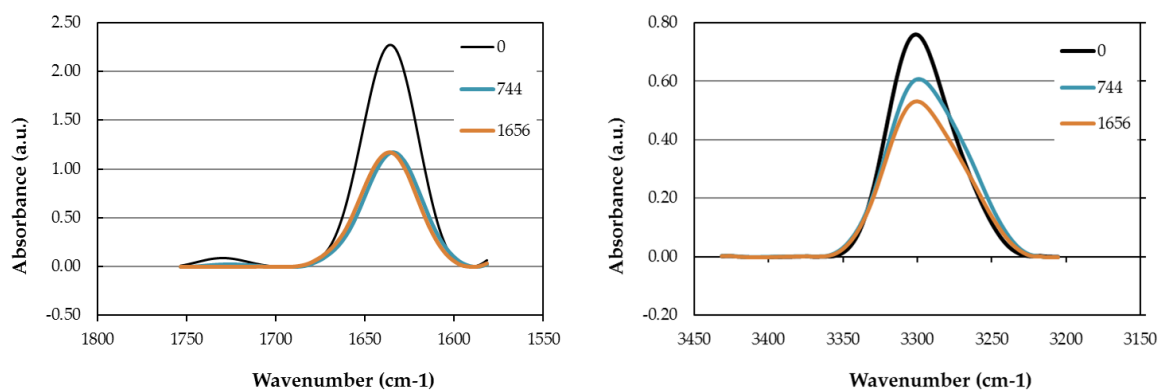

Figure S1: Comparison of OH/NH and amide I bands for PA11-W at different aging times

Table S3: Calculated area assigned to each FTIR peaks for PA11-W

| Time (h) | Area       | Peak | %   |
|----------|------------|------|-----|
| 0        | 46.983032  | 3306 | -   |
|          | 109.406387 | 1635 | -   |
| 744      | 40.4783678 | 3304 | -14 |
|          | 56.3515581 | 1635 | -48 |
| 1656     | 35.4565545 | 3304 | -25 |
|          | 55.7435171 | 1635 | -49 |

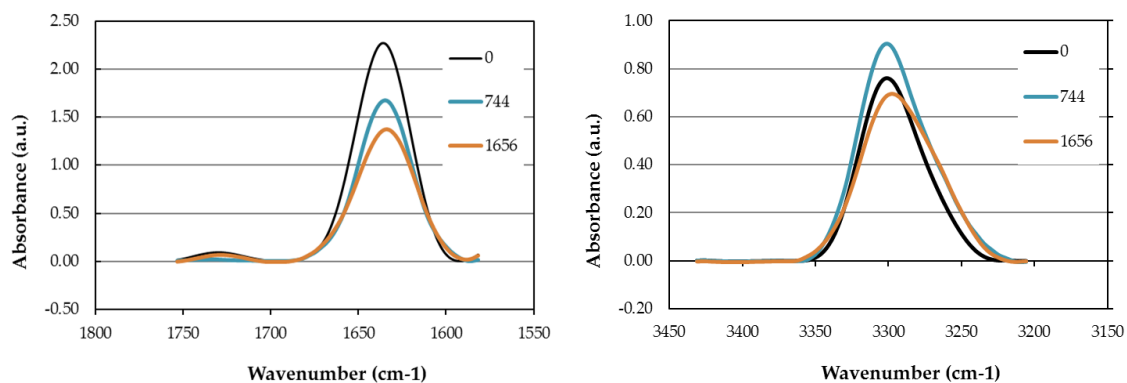

Figure S2: Comparison of OH/NH and amide I bands for PA11-RH at different aging times

Table S4: Calculated area assigned to each FTIR peaks for PA11-RH

| Time (h) | Area       | Peak | %   |
|----------|------------|------|-----|
| 0        | 46.983032  | 3306 | -   |
|          | 109.406387 | 1635 | -   |
| 744      | 65.3443497 | 3074 | 39  |
|          | 80.7633659 | 1635 | -26 |
| 1656     | 47.3723562 | 3082 | 1   |

|  |            |      |     |
|--|------------|------|-----|
|  | 66.3917079 | 1635 | -39 |
|--|------------|------|-----|

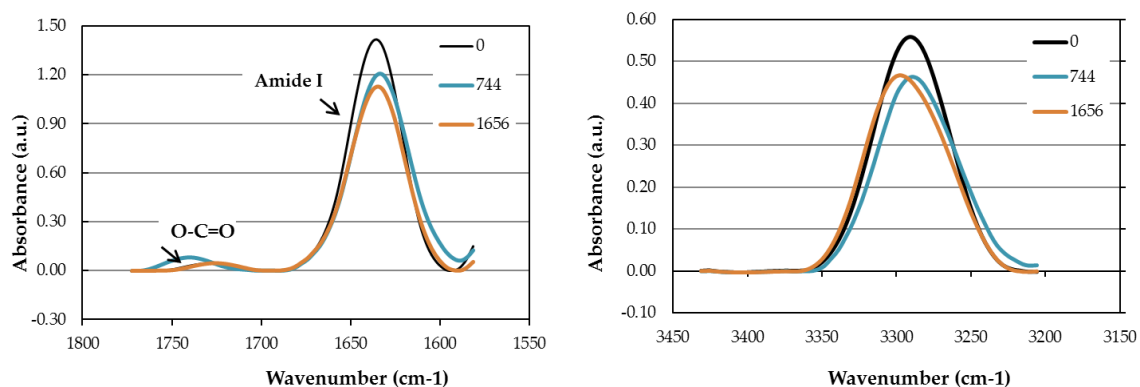

Figure S3: Comparison of OH/NH and amide I bands for PA12-W at different aging times

Table S5: Calculated area assigned to each FTIR peaks for PA12-W

| Time (h) | Area       | Peak | %   |
|----------|------------|------|-----|
| 0        | 37.8556171 | 3292 | -   |
|          | 59.957971  | 1639 | -   |
|          | 0.81490237 | 1732 | -   |
| 744      | 32.3649299 | 3292 | -15 |
|          | 56.6839088 | 1638 | -5  |
|          | 1.7148249  | 1739 | 110 |
| 1656     | 31.9312965 | 3302 | -16 |
|          | 52.1830946 | 1633 | -13 |
|          | 0.91806917 | 1724 | 13  |

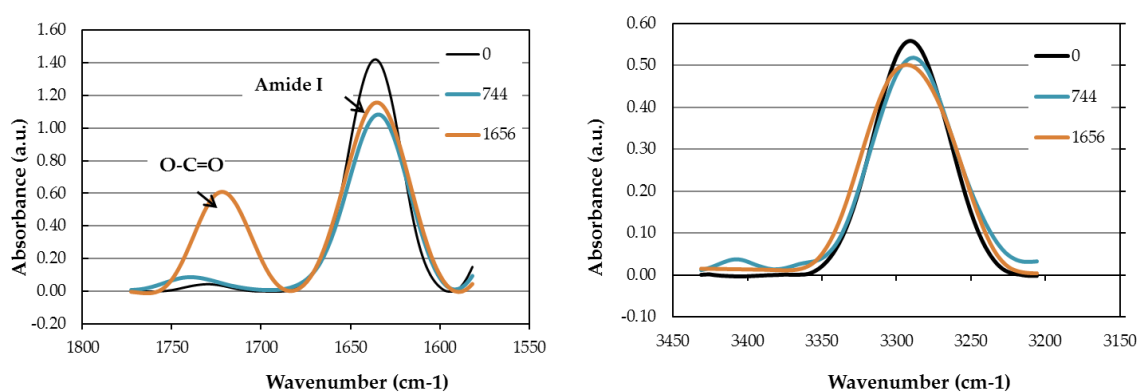

Figure S4: Comparison of OH/NH and amide I bands for PA12-RH at different aging times

Table S6: Calculated area assigned to each FTIR peaks for PA12-RH

| <b>Time (h)</b> | <b>Area</b> | <b>Peak</b> | <b>%</b> |
|-----------------|-------------|-------------|----------|
| 0               | 37.8556171  | 3292        | -        |
|                 | 59.957971   | 1639        | -        |
|                 | 0.81490237  | 1732        | -        |
| 744             | 38.6684452  | 3298        | 2        |
|                 | 52.0158558  | 1635        | -13      |
|                 | 3.03641398  | 1738        | 273      |
| 1656            | 38.6684452  | 3298        | 2        |
|                 | 48.6039726  | 1635        | -19      |
|                 | 20.5115793  | 1722        | 2417     |
